# Supplementary material for: A Densely Interconnected Genome-Wide Network of MicroRNAs and Oncogenic Pathways Revealed Using Gene Expression Signatures
Source: PLoS Genet. 2011 Dec 15;7(12):e1002415. doi: 10.1371/journal.pgen.1002415 (PMC3240594; doi:10.1371/journal.pgen.1002415)
Supplement: Table S2 — Sizes of gastric-derived miRNA signatures. (XLS) [file pgen.1002415.s004.xls]

## Sheet: disp
Table S2: Sizes of miRNA signatures derived from gastric profiles.
miRNA	#Upregulated genes	#Downregulated genes	Signature size
ebv-miR-BART1-5p	3	36	39
ebv-miR-BART10	4	10	14
ebv-miR-BART12	26	19	45
ebv-miR-BART13	1	3	4
ebv-miR-BART14	4	13	17
ebv-miR-BART15	3	16	19
ebv-miR-BART16	9	4	13
ebv-miR-BART19-3p	3	1	4
ebv-miR-BART20-3p	12	56	68
ebv-miR-BART20-5p	2	7	9
ebv-miR-BART3(a)	4	9	13
ebv-miR-BART4	3	11	14
ebv-miR-BART7	2	8	10
ebv-miR-BART9(a)	2	10	12
ebv-miR-BHRF1-1	5	4	9
hcmv-miR-UL148D	4	9	13
hcmv-miR-UL22A	5	9	14
hcmv-miR-UL36	5	4	9
hcmv-miR-UL70-3p	6	62	68
hcmv-miR-US25-2-5p	2	4	6
hcmv-miR-US33-3p	12	1	13
hcmv-miR-US33-5p	7	8	15
hcmv-miR-US4	6	8	14
hiv1-miR-H1	2	0	2
hiv1-miR-N367	11	3	14
hsa-let-7a	8	4	12
hsa-let-7a(a)	3	12	15
hsa-let-7b	13	4	17
hsa-let-7b(a)	49	174	223
hsa-let-7c	8	2	10
hsa-let-7c(a)	16	4	20
hsa-let-7d	5	2	7
hsa-let-7d(a)	21	18	39
hsa-let-7e	24	14	38
hsa-let-7e(a)	47	19	66
hsa-let-7f	4	1	5
hsa-let-7f-1(a)	1	7	8
hsa-let-7f-2(a)	3	3	6
hsa-let-7g	18	14	32
hsa-let-7i	16	5	21
hsa-let-7i(a)	39	43	82
hsa-miR-100	251	270	521
hsa-miR-100(a)	55	26	81
hsa-miR-101	2	0	2
hsa-miR-103	7	9	16
hsa-miR-105	31	8	39
hsa-miR-106a	6	5	11
hsa-miR-106b	35	39	74
hsa-miR-106b(a)	4	6	10
hsa-miR-107	3	9	12
hsa-miR-10a	3	1	4
hsa-miR-10a(a)	6	0	6
hsa-miR-10b	15	15	30
hsa-miR-10b(a)	1	4	5
hsa-miR-122	33	20	53
hsa-miR-1224-3p	18	73	91
hsa-miR-1224-5p	3	7	10
hsa-miR-1225-3p	1	3	4
hsa-miR-1225-5p	5	25	30
hsa-miR-1226(a)	5	6	11
hsa-miR-1227	28	94	122
hsa-miR-1228	10	27	37
hsa-miR-1228(a)	6	13	19
hsa-miR-1229	3	5	8
hsa-miR-1234	10	4	14
hsa-miR-1236	5	8	13
hsa-miR-1237	2	2	4
hsa-miR-1238	3	0	3
hsa-miR-125a-3p	4	7	11
hsa-miR-125a-5p	8	11	19
hsa-miR-125b	252	222	474
hsa-miR-125b-2(a)	2	12	14
hsa-miR-126	8	11	19
hsa-miR-126(a)	1	11	12
hsa-miR-127-3p	366	95	461
hsa-miR-128	10	10	20
hsa-miR-129(a)	22	17	39
hsa-miR-129-3p	30	15	45
hsa-miR-129-5p	3	3	6
hsa-miR-130a	102	151	253
hsa-miR-130b	6	11	17
hsa-miR-132	3	3	6
hsa-miR-132(a)	28	18	46
hsa-miR-133b	3	18	21
hsa-miR-134	8	25	33
hsa-miR-135a(a)	3	5	8
hsa-miR-135b	92	19	111
hsa-miR-136	192	109	301
hsa-miR-136(a)	548	299	847
hsa-miR-137	156	87	243
hsa-miR-138	70	84	154
hsa-miR-138-2(a)	4	5	9
hsa-miR-139-3p	1	4	5
hsa-miR-140-3p	9	67	76
hsa-miR-140-5p	12	56	68
hsa-miR-141	275	119	394
hsa-miR-141(a)	274	105	379
hsa-miR-142-3p	11	15	26
hsa-miR-142-5p	7	56	63
hsa-miR-143	213	153	366
hsa-miR-143(a)	445	625	1070
hsa-miR-144	22	60	82
hsa-miR-145	197	112	309
hsa-miR-145(a)	548	299	847
hsa-miR-146a	23	6	29
hsa-miR-146b-5p	6	8	14
hsa-miR-147b	2	10	12
hsa-miR-148a	1	0	1
hsa-miR-148a(a)	3	10	13
hsa-miR-148b	10	7	17
hsa-miR-148b(a)	6	11	17
hsa-miR-149	22	11	33
hsa-miR-149(a)	0	12	12
hsa-miR-150	20	58	78
hsa-miR-150(a)	1	8	9
hsa-miR-151-3p	5	0	5
hsa-miR-151-5p	6	2	8
hsa-miR-152	129	58	187
hsa-miR-153	17	21	38
hsa-miR-154	548	299	847
hsa-miR-154(a)	441	174	615
hsa-miR-155	9	9	18
hsa-miR-15a	4	0	4
hsa-miR-15a(a)	5	5	10
hsa-miR-15b	4	2	6
hsa-miR-15b(a)	2	1	3
hsa-miR-16	3	1	4
hsa-miR-16-2(a)	2	4	6
hsa-miR-17	13	11	24
hsa-miR-17(a)	13	32	45
hsa-miR-181a	5	5	10
hsa-miR-181a(a)	5	5	10
hsa-miR-181a-2(a)	186	86	272
hsa-miR-181b	6	4	10
hsa-miR-181c	12	3	15
hsa-miR-181c(a)	31	8	39
hsa-miR-181d	27	36	63
hsa-miR-182	9	4	13
hsa-miR-182(a)	7	13	20
hsa-miR-183	6	6	12
hsa-miR-183(a)	4	7	11
hsa-miR-184	5	5	10
hsa-miR-185	6	10	16
hsa-miR-186	3	6	9
hsa-miR-187(a)	8	5	13
hsa-miR-188-3p	81	81	162
hsa-miR-188-5p	4	13	17
hsa-miR-18a	12	27	39
hsa-miR-18b	12	34	46
hsa-miR-190	19	26	45
hsa-miR-191	2	3	5
hsa-miR-191(a)	2	0	2
hsa-miR-192	234	60	294
hsa-miR-192(a)	355	135	490
hsa-miR-193a-3p	3	2	5
hsa-miR-193a-5p	10	18	28
hsa-miR-193b	5	4	9
hsa-miR-193b(a)	3	4	7
hsa-miR-194	349	93	442
hsa-miR-194(a)	286	79	365
hsa-miR-195	24	13	37
hsa-miR-195(a)	3	13	16
hsa-miR-196a	11	2	13
hsa-miR-196b	20	2	22
hsa-miR-197	30	32	62
hsa-miR-198	4	4	8
hsa-miR-199a-5p	403	190	593
hsa-miR-199b-3p	499	184	683
hsa-miR-199b-5p	326	170	496
hsa-miR-19a	15	28	43
hsa-miR-19b	17	8	25
hsa-miR-19b-1(a)	25	27	52
hsa-miR-200a	550	214	764
hsa-miR-200a(a)	165	36	201
hsa-miR-200b	517	157	674
hsa-miR-200b(a)	64	30	94
hsa-miR-200c	291	72	363
hsa-miR-200c(a)	131	69	200
hsa-miR-202	6	8	14
hsa-miR-203	226	110	336
hsa-miR-204	13	49	62
hsa-miR-205	64	16	80
hsa-miR-206	6	4	10
hsa-miR-20a	13	13	26
hsa-miR-20a(a)	20	13	33
hsa-miR-20b	10	10	20
hsa-miR-21	14	3	17
hsa-miR-21(a)	5	4	9
hsa-miR-210	1	0	1
hsa-miR-212	4	3	7
hsa-miR-214	191	73	264
hsa-miR-214(a)	350	187	537
hsa-miR-215	295	54	349
hsa-miR-218	96	43	139
hsa-miR-219-5p	6	6	12
hsa-miR-22	11	16	27
hsa-miR-22(a)	95	17	112
hsa-miR-221	51	10	61
hsa-miR-221(a)	19	8	27
hsa-miR-222	16	13	29
hsa-miR-224	5	4	9
hsa-miR-23a	29	36	65
hsa-miR-23a(a)	8	14	22
hsa-miR-23b	11	2	13
hsa-miR-23b(a)	4	3	7
hsa-miR-24	15	18	33
hsa-miR-24-1(a)	4	3	7
hsa-miR-25	2	3	5
hsa-miR-25(a)	11	29	40
hsa-miR-26a	8	13	21
hsa-miR-26a-1(a)	4	7	11
hsa-miR-26b	61	27	88
hsa-miR-27a	9	17	26
hsa-miR-27b	5	4	9
hsa-miR-27b(a)	4	11	15
hsa-miR-28-3p	0	5	5
hsa-miR-28-5p	2	1	3
hsa-miR-296-5p	5	2	7
hsa-miR-298	0	9	9
hsa-miR-299-3p	64	35	99
hsa-miR-299-5p	158	56	214
hsa-miR-29a	24	8	32
hsa-miR-29a(a)	17	2	19
hsa-miR-29b	20	5	25
hsa-miR-29b-1(a)	5	5	10
hsa-miR-29c	7	6	13
hsa-miR-29c(a)	99	58	157
hsa-miR-300	7	27	34
hsa-miR-301a	3	1	4
hsa-miR-301b	1	0	1
hsa-miR-30a	24	8	32
hsa-miR-30a(a)	47	10	57
hsa-miR-30b	7	6	13
hsa-miR-30b(a)	6	2	8
hsa-miR-30c	15	13	28
hsa-miR-30c-1(a)	1	7	8
hsa-miR-30c-2(a)	11	10	21
hsa-miR-30d	19	4	23
hsa-miR-30d(a)	0	0	0
hsa-miR-30e	2	3	5
hsa-miR-30e(a)	13	13	26
hsa-miR-31	4	9	13
hsa-miR-31(a)	6	5	11
hsa-miR-32	5	7	12
hsa-miR-32(a)	13	8	21
hsa-miR-320	13	20	33
hsa-miR-323-3p	441	174	615
hsa-miR-324-3p	11	21	32
hsa-miR-324-5p	3	3	6
hsa-miR-326	6	1	7
hsa-miR-328	46	138	184
hsa-miR-329	441	174	615
hsa-miR-330-3p	5	8	13
hsa-miR-331-3p	8	5	13
hsa-miR-331-5p	2	9	11
hsa-miR-335	10	21	31
hsa-miR-335(a)	20	72	92
hsa-miR-337-3p	514	203	717
hsa-miR-337-5p	548	299	847
hsa-miR-338-3p	161	82	243
hsa-miR-338-5p	5	0	5
hsa-miR-339-3p	3	1	4
hsa-miR-33a	81	150	231
hsa-miR-33b	5	1	6
hsa-miR-33b(a)	3	1	4
hsa-miR-340	2	6	8
hsa-miR-342-3p	105	40	145
hsa-miR-342-5p	60	25	85
hsa-miR-345	3	19	22
hsa-miR-346	9	23	32
hsa-miR-34a	6	2	8
hsa-miR-34a(a)	12	8	20
hsa-miR-34b	13	31	44
hsa-miR-34b(a)	9	6	15
hsa-miR-34c-3p	1	4	5
hsa-miR-34c-5p	120	64	184
hsa-miR-361-3p	7	1	8
hsa-miR-361-5p	6	3	9
hsa-miR-362-3p	15	40	55
hsa-miR-362-5p	25	35	60
hsa-miR-363	0	4	4
hsa-miR-365	24	7	31
hsa-miR-369-5p	441	174	615
hsa-miR-370	7	3	10
hsa-miR-371-3p	21	17	38
hsa-miR-371-5p	0	1	1
hsa-miR-372	63	33	96
hsa-miR-373	58	30	88
hsa-miR-373(a)	10	7	17
hsa-miR-374a	15	13	28
hsa-miR-374b	8	5	13
hsa-miR-374b(a)	2	17	19
hsa-miR-375	152	100	252
hsa-miR-376a	570	315	885
hsa-miR-376a(a)	490	191	681
hsa-miR-376b	490	191	681
hsa-miR-376c	526	299	825
hsa-miR-377	353	192	545
hsa-miR-377(a)	441	174	615
hsa-miR-378	5	18	23
hsa-miR-378(a)	2	6	8
hsa-miR-379	129	87	216
hsa-miR-381	108	180	288
hsa-miR-382	20	17	37
hsa-miR-383	2	3	5
hsa-miR-409-3p	74	23	97
hsa-miR-409-5p	441	174	615
hsa-miR-410	548	299	847
hsa-miR-411	548	299	847
hsa-miR-411(a)	178	62	240
hsa-miR-421	3	1	4
hsa-miR-422a	1	9	10
hsa-miR-423-3p	6	2	8
hsa-miR-423-5p	7	2	9
hsa-miR-424	121	82	203
hsa-miR-424(a)	4	3	7
hsa-miR-425	9	16	25
hsa-miR-425(a)	5	6	11
hsa-miR-429	561	185	746
hsa-miR-431	286	114	400
hsa-miR-431(a)	1	1	2
hsa-miR-432	49	72	121
hsa-miR-432(a)	4	9	13
hsa-miR-449a	2	6	8
hsa-miR-450a	32	29	61
hsa-miR-451	51	37	88
hsa-miR-452	6	2	8
hsa-miR-454	15	15	30
hsa-miR-454(a)	11	16	27
hsa-miR-455-3p	8	7	15
hsa-miR-455-5p	8	13	21
hsa-miR-483-3p	24	17	41
hsa-miR-483-5p	2	5	7
hsa-miR-484	2	2	4
hsa-miR-485-3p	20	99	119
hsa-miR-485-5p	8	24	32
hsa-miR-486-3p	11	3	14
hsa-miR-486-5p	2	2	4
hsa-miR-487a	23	22	45
hsa-miR-487b	70	7	77
hsa-miR-489	3	9	12
hsa-miR-490-3p	109	300	409
hsa-miR-490-5p	8	13	21
hsa-miR-491-3p	12	29	41
hsa-miR-491-5p	0	11	11
hsa-miR-492	2	3	5
hsa-miR-493	54	42	96
hsa-miR-493(a)	74	57	131
hsa-miR-494	3	4	7
hsa-miR-495	441	174	615
hsa-miR-497	90	75	165
hsa-miR-498	3	6	9
hsa-miR-500	1	1	2
hsa-miR-500(a)	70	47	117
hsa-miR-501-3p	5	17	22
hsa-miR-501-5p	4	9	13
hsa-miR-502-3p	77	62	139
hsa-miR-502-5p	38	81	119
hsa-miR-503	106	126	232
hsa-miR-505	1	1	2
hsa-miR-505(a)	8	5	13
hsa-miR-508-3p	2	7	9
hsa-miR-509-3-5p	9	5	14
hsa-miR-509-5p	3	3	6
hsa-miR-512-3p	6	14	20
hsa-miR-513a-3p	1	3	4
hsa-miR-513a-5p	2	1	3
hsa-miR-513b	1	2	3
hsa-miR-513c	1	5	6
hsa-miR-516a-3p	44	36	80
hsa-miR-516a-5p	5	4	9
hsa-miR-516b	3	3	6
hsa-miR-517(a)	1	9	10
hsa-miR-517a	56	23	79
hsa-miR-517c	33	5	38
hsa-miR-518c(a)	1	18	19
hsa-miR-518d-5p	49	42	91
hsa-miR-518e(a)	44	36	80
hsa-miR-519a	32	4	36
hsa-miR-519e(a)	34	19	53
hsa-miR-520b	0	15	15
hsa-miR-520d-3p	9	7	16
hsa-miR-520e	10	17	27
hsa-miR-521	32	6	38
hsa-miR-522	99	40	139
hsa-miR-525-5p	10	11	21
hsa-miR-526b	5	3	8
hsa-miR-532-3p	14	21	35
hsa-miR-532-5p	102	61	163
hsa-miR-539	67	95	162
hsa-miR-542-3p	35	10	45
hsa-miR-542-5p	51	23	74
hsa-miR-543	441	174	615
hsa-miR-545	1	0	1
hsa-miR-548c-5p	5	3	8
hsa-miR-548d-5p	7	5	12
hsa-miR-550	0	2	2
hsa-miR-550(a)	2	22	24
hsa-miR-551b	262	95	357
hsa-miR-557	6	34	40
hsa-miR-564	2	5	7
hsa-miR-570	0	9	9
hsa-miR-571	1	2	3
hsa-miR-572	3	10	13
hsa-miR-574-3p	34	26	60
hsa-miR-574-5p	3	2	5
hsa-miR-575	1	12	13
hsa-miR-582-3p	9	16	25
hsa-miR-582-5p	18	8	26
hsa-miR-583	3	45	48
hsa-miR-584	16	16	32
hsa-miR-590-5p	17	32	49
hsa-miR-592	5	19	24
hsa-miR-595	25	66	91
hsa-miR-596	34	131	165
hsa-miR-598	3	4	7
hsa-miR-601	4	20	24
hsa-miR-602	4	10	14
hsa-miR-605	4	20	24
hsa-miR-609	11	45	56
hsa-miR-610	2	5	7
hsa-miR-614	4	17	21
hsa-miR-615-3p	3	2	5
hsa-miR-616	3	13	16
hsa-miR-617	1	2	3
hsa-miR-622	3	4	7
hsa-miR-623	24	17	41
hsa-miR-624(a)	11	13	24
hsa-miR-625	8	6	14
hsa-miR-625(a)	4	10	14
hsa-miR-627	3	3	6
hsa-miR-628-3p	3	10	13
hsa-miR-629	3	10	13
hsa-miR-629(a)	0	3	3
hsa-miR-630	10	31	41
hsa-miR-631	7	9	16
hsa-miR-632	1	21	22
hsa-miR-634	5	8	13
hsa-miR-636	6	0	6
hsa-miR-638	2	19	21
hsa-miR-640	1	3	4
hsa-miR-641	4	9	13
hsa-miR-647	21	80	101
hsa-miR-648	1	4	5
hsa-miR-650	7	2	9
hsa-miR-652	83	11	94
hsa-miR-654-3p	58	63	121
hsa-miR-654-5p	2	12	14
hsa-miR-658	2	3	5
hsa-miR-660	15	75	90
hsa-miR-662	5	11	16
hsa-miR-663	3	22	25
hsa-miR-665	2	10	12
hsa-miR-671-5p	4	4	8
hsa-miR-675	3	5	8
hsa-miR-7	12	18	30
hsa-miR-7-1(a)	2	2	4
hsa-miR-708	2	26	28
hsa-miR-744	4	1	5
hsa-miR-744(a)	23	95	118
hsa-miR-758	135	64	199
hsa-miR-760	0	0	0
hsa-miR-765	1	3	4
hsa-miR-766	37	55	92
hsa-miR-767-5p	16	7	23
hsa-miR-768-3p	6	2	8
hsa-miR-768-5p	2	4	6
hsa-miR-769-3p	0	9	9
hsa-miR-769-5p	2	5	7
hsa-miR-770-5p	4	3	7
hsa-miR-801	0	4	4
hsa-miR-873	3	3	6
hsa-miR-874	6	9	15
hsa-miR-876-5p	2	5	7
hsa-miR-877	0	4	4
hsa-miR-877(a)	10	6	16
hsa-miR-885-3p	5	4	9
hsa-miR-885-5p	38	58	96
hsa-miR-886-3p	8	16	24
hsa-miR-886-5p	4	14	18
hsa-miR-887	12	27	39
hsa-miR-889	441	174	615
hsa-miR-890	1	3	4
hsa-miR-892b	4	4	8
hsa-miR-9	24	9	33
hsa-miR-9(a)	12	8	20
hsa-miR-921	1	3	4
hsa-miR-923	3	5	8
hsa-miR-92a	5	14	19
hsa-miR-92a-1(a)	9	28	37
hsa-miR-92b	4	1	5
hsa-miR-93	16	16	32
hsa-miR-93(a)	1	3	4
hsa-miR-933	3	3	6
hsa-miR-934	1	8	9
hsa-miR-935	0	3	3
hsa-miR-936	2	5	7
hsa-miR-937	16	80	96
hsa-miR-939	2	6	8
hsa-miR-940	4	3	7
hsa-miR-95	8	6	14
hsa-miR-96	42	27	69
hsa-miR-98	19	3	22
hsa-miR-99a	186	309	495
hsa-miR-99a(a)	27	181	208
hsa-miR-99b	16	9	25
hsa-miR-99b(a)	3	3	6
hsv1-miR-H1	3	5	8
hsv1-miR-LAT	6	13	19
kshv-miR-K12-1	2	6	8
kshv-miR-K12-10a	2	9	11
kshv-miR-K12-12	22	69	91
kshv-miR-K12-3	6	3	9
kshv-miR-K12-4-5p	15	7	22
kshv-miR-K12-7	2	3	5
kshv-miR-K12-8	0	5	5
